# Supplementary material for: miR-155 Controls Lymphoproliferation in LAT Mutant Mice by Restraining T-Cell Apoptosis via SHIP-1/mTOR and PAK1/FOXO3/BIM Pathways
Source: PubMed Central journal article supplement (PMC4487994; doi:10.1371/journal.pone.0131823), 2015-06-29
Supplement: pone.0131823.s001.pdf [file pone.0131823.s001.pdf]

**A**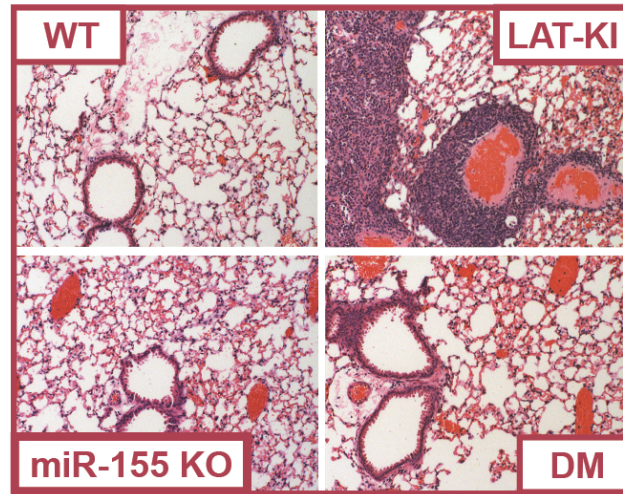**B**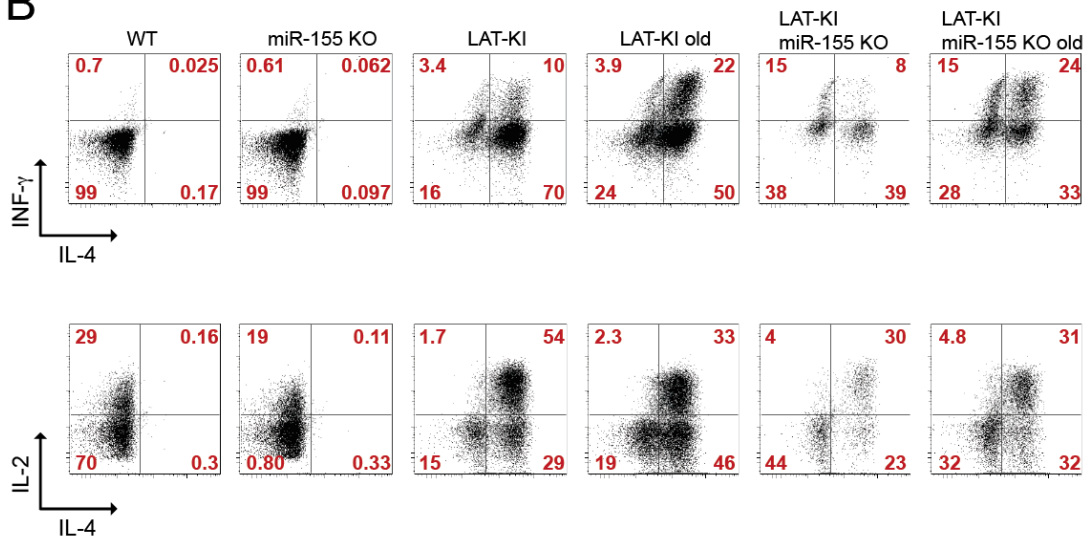**S1 Fig. miR-155 deficiency delays Th2 lymphoproliferative disease.**

**A.** Photomicrographs of H&E-stained sections of lungs from mice of the indicated genotypes (10X objective) show reduced lymphocyte infiltration in lungs of DM compared to LAT-KI mice. Ages of the mice were 11.5 wks (WT), 34 wks (miR155<sup>-/-</sup>), 11.5 wks (LAT-KI) and 11 wks (DM). Results are representative of 6 experiments. **B.** Intracellular cytokine production by lymph node CD4<sup>+</sup> T cells from mice of the indicated genotypes. The ages of the mice were 10 wks (WT), 9 wks (miR155<sup>-/-</sup>), 9 wks (LAT-KI), 16 wks (LAT-KI-old), 9 wks (DM), and 20 wks (DM-old). Results are representative of 2 experiments.
